# Supplementary material for: Revival of deuterium-labeled reagents for protein quantitation
Source: Royal Society of Chemistry journal article supplement (doi:10.1039/b906335h), 2009-01-01
Supplement: b906335h.pdf [file b906335h.pdf]

(d, J = 6.7 Hz, 3H);  $^{13}\text{C-NMR}$  ( $\text{D}_2\text{O}$ , 500 MHz)  $\delta$  = 177.0, 167.9, 67.7, 41.4, 36.9, 36.0, 33.1, 25.1, 22.8, 20.4;  $\text{MS}$  (M+H) $^+$  = 231.10, Cal. (M+H) $^+$  = 231.16

### Compound 4

Compound 3 (115 mg, 0.50 mmol) was added to the mixture of NHS (59 mg, 0.51 mmol) and DCC (113 mg, 0.55 mmol) in 10 mL DCM. The reaction mixture was stirred for 2 days at room temperature and insoluble solid was filtered out. After the solvent was evaporated, the residue was recrystallized from diisopropyl ether to afford compound 4 (106 mg, 65% yield) as white solid.

$^1\text{H-NMR}$  ( $\text{CDCl}_3$ , 500 MHz)  $\delta$  = 3.61 (m, 1H), 3.27 (t, J = 6.5 Hz, 2H), 2.82 (t, J = 6.3 Hz, 2H), 2.66 (s, 6H), 2.61 (s, 4H), 1.74-1.61 (m, 2H), 1.43-1.37 (m, 1H), 0.94 (d, J = 6.7 Hz, 3H), 0.92 (d, J = 6.7 Hz, 3H).  $^{13}\text{C-NMR}$  ( $\text{CDCl}_3$ , 500 MHz)  $\delta$  = 174.0, 169.1, 168.0, 66.8, 41.8, 36.4, 34.8, 31.4, 25.6, 25.0, 23.5, 21.7.  $\text{MS}$  (M+H) $^+$  = 328.11, Cal. (M+H) $^+$  = 328.18.

Table 1. Isotope-labeled starting materials for DiART reagents

|                     | DiART-114                                                                           | DiART-115                                                                           | DiART-116                                                                           | DiART-117                                                                            | DiART-118          | DiART-119       |
|---------------------|-------------------------------------------------------------------------------------|-------------------------------------------------------------------------------------|-------------------------------------------------------------------------------------|--------------------------------------------------------------------------------------|--------------------|-----------------|
| Leu-OH              | 1- $^{13}\text{C}$                                                                  | $^{15}\text{N}$                                                                     | 1- $^{13}\text{C}$                                                                  | $^{15}\text{N}$                                                                      | 1- $^{13}\text{C}$ | $^{15}\text{N}$ |
| HCHO                | unlabeled                                                                           | unlabeled                                                                           | unlabeled                                                                           | unlabeled                                                                            | DCDO               | DCDO            |
| NaCNBH <sub>3</sub> | unlabeled                                                                           | unlabeled                                                                           | NaCNBD <sub>3</sub>                                                                 | NaCNBD <sub>3</sub>                                                                  | unlabeled          | unlabeled       |
| $\beta$ -Ala-OH     | 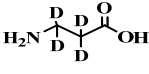 |  |  |  | unlabeled          | unlabeled       |

1- $^{13}\text{C}$  and  $^{15}\text{N}$  labeled leucine were purchased from Cambridge Isotope Laboratory, Inc. DCDO and NaCNBD<sub>3</sub> were purchased from Sigma. D<sub>4</sub>- $\beta$ -alanine was purchased from C/D/N Isotopes Inc. D<sub>2</sub>- $\beta$ -alanine was synthesized in house<sup>4</sup>.

### 2. HPLC of DiART-labeled phenylalanine

Six different amount of phenylalanine were reacted with each excess DiART reagent in a mixture ( $\text{NaHCO}_3$ , 50 mM, and 1,4-dioxane, 50%), respectively, mixed, and then purified with C<sub>18</sub>-HPLC (Buffer A: water, 0.1% TFA; Buffer B: acetonitrile, 0.1% TFA; gradient: 0-6 mins 10% B, 6-8 mins 10% to 20% B, 8-48 mins 20% B to 60% B; flow rate: 1 mL/min) (see Figure 1 in this supporting information). The purified product was re-injected into HPLC using the same program. A single broad peak of the product was observed. Three time fractions of this peak were collected and analyzed with MALDI-MS/MS (see Figure 2a in paper).

### 3. Protein quantitation with DiART reagents and Mascot software

#### 3.1 Detailed procedure

BSA (20  $\mu\text{g}$ ), bovine catalase (20  $\mu\text{g}$ ), and chicken ovalbumin (10  $\mu\text{g}$ ) were dissolved in 100  $\mu\text{L}$  denaturing/reducing solution (8 M urea, 50 mM Sodium borate buffer, pH = 8.3, 5 mM TCEP) and incubated at 37  $^\circ\text{C}$  for 30 min. Then, 20 mM 2-bromoacetamide was added to alkylate free cysteine residues. The proteins were

precipitated with acetone, dissolved again in 100  $\mu$ L buffer (200 mM Sodium borate buffer, pH = 8.3, 0.8 M urea), and then digested with trypsin (10  $\mu$ g) at 37 °C overnight. Six fractions of samples (10  $\mu$ L) were mixed with 20  $\mu$ L DiART reagents (2 mg/mL in ethanol), respectively and the reaction was incubated at room temperature for 4 h. All of six samples were then mixed together, dried in a SpeedVac, then dissolved again in a SCX (strong ion exchange) loading buffer (10 mM  $\text{KH}_2\text{PO}_4$ , pH = 3.0, 25% acetonitrile). This sample was loaded onto a SCX column, washed, and eluted with 500  $\mu$ L elution buffer (10 mM  $\text{KH}_2\text{PO}_4$ , pH = 3.0, 400 mM KCl, 25% acetonitrile). The elution was dried in SpeedVac and dissolved in 100  $\mu$ L 5% acetonitrile. 4  $\mu$ L of labeled peptide sample was injected into a capillary reverse phase HPLC (gradient, 5% acetonitrile, 0.1% TFA to 50% acetonitrile, 0.1% TFA in 60 min; column, Agilent Zorbax C18, 5  $\mu$ m, 150 $\times$ 0.5 mm; flow rate, 15  $\mu$ L/min) and each fraction was analyzed with ABI-4700 MALDI-MS/MS.

### 3.2. Isotope purity of DiART reagents

The isotope purity of DiART reagents was determined as described previously<sup>5</sup>. These numbers were included in a Mascot server configuration file in order to get correct quantitation.

Table-2. Isotope purity

| $\Delta(M/Z)$ | -2    | -1    | 0     | +1    | +2    |
|---------------|-------|-------|-------|-------|-------|
| DiART-114     | 0.000 | 0.000 | 0.925 | 0.075 | 0.000 |
| DiART-115     | 0.000 | 0.065 | 0.842 | 0.093 | 0.000 |
| DiART-116     | 0.000 | 0.076 | 0.840 | 0.084 | 0.000 |
| DiART-117     | 0.000 | 0.116 | 0.815 | 0.069 | 0.000 |
| DiART-118     | 0.000 | 0.000 | 0.914 | 0.086 | 0.000 |
| DiART-119     | 0.000 | 0.092 | 0.821 | 0.087 | 0.000 |

### 3.3. Compatibility of DiART reagents with custom-configured Mascot sever

Only two configuration files in Mascot sever (version 2.2 only) need to be updated to make the server compatible with DiART-based protein identification and quantitation. These two files (unimod.xml and quantitation.xml) will be distributed freely upon request. A result of Mascot searching is attached as an example.

## 4. References

- 1) Murphy, R.F.; Douglas, A.J.; Walker, B. *US Patent* 4997950, **1991**.
- 2) Erickson, B.W. *US Patent* 4515920, **1985**.
- 3) Nakamura, M.; Yamaguchi, M.; Sakai, O.; Inoue, J. *Bioorg. Med. Chem.* **2003**, 11, 1371–1379.
- 4) Hanai, K.; Kuwae, A. *J. Labelled Comp. Rad.*, **1988**, 25, 217-224.
- 5) Zeng, D.; Li, S.W. *Bioorg. Med. Chem. Lett.*, **2009**, 19, 2059-2061.

==== Shimadzu LCsolution Analysis Report ====

C:\LabSolutions\Data\Project1\dexing\Data-08\110508e.lcd  
Acquired by : Admin  
Sample Name : 1  
Sample ID :  
Tray# : 1  
Vial # : 2  
Injection Volume : 100 uL  
Data File Name : 110508e.lcd  
Method File Name : 40min-philic.lcm  
Batch File Name : 050908.lcb  
Report File Name : Default.lcr  
Data Acquired : 2008-11-5 22:10:13  
Data Processed : 2008-11-5 23:15:15

<Chromatogram>

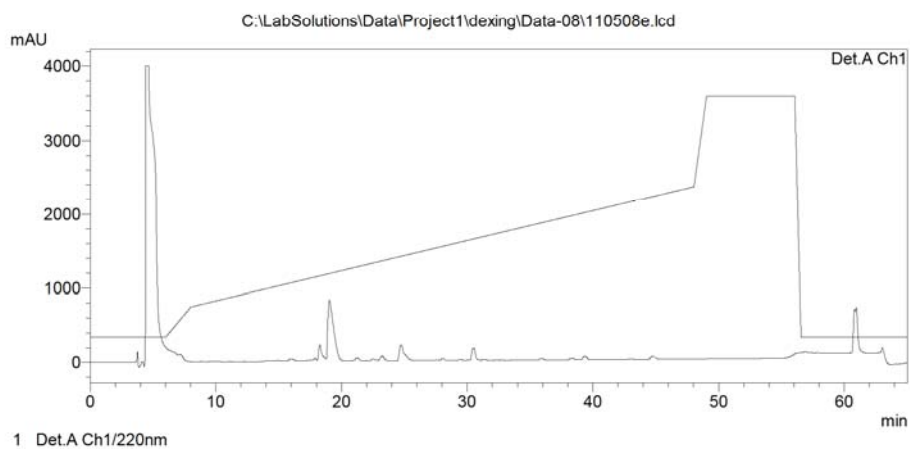

C:\LabSolutions\Data\Project1\dexing\Data-08\110508e.lcd

Figure 1

# MASCOT SCIENCE Mascot Search Results

Supports the publication of Mascot search results  
This journal is (c) The Royal Society of Chemistry 2009

**User** : Mascot Daemon  
**Email** : daemon@localhost  
**Search title** : Submitted from DiART-New by Mascot Daemon on LIW-XP  
**MS data file** : E:\Laboratory\Projects\Proteomics\DiART\NewMultiFile2.mgf  
**Database** : MSDB 20060831 (3239079 sequences; 1079594700 residues)  
**Quantitation** : DiART6plex [method details](#)  
 : Omic Biosystems DiART 6-plex reagent  
**Timestamp** : 25 Mar 2009 at 02:17:26 GMT  
**Protein hits** : 115/114 116/114 117/114 118/114 119/114  
 0.996 1.022 1.056 1.095 0.910 [CATA\\_BOVIN](#) Catalase (EC 1.11.1.6).- Bos taurus (Bovine).  
 --- --- --- --- --- [OACH](#) ovalbumin [validated] - chicken  
 1.017 1.053 1.086 1.142 1.044 [ABBOS](#) serum albumin precursor [validated] - bovine

## Probability Based Mowse Score

Ions score is  $-10 \cdot \log(P)$ , where P is the probability that the observed match is a random event.  
 Individual ions scores > 42 indicate identity or extensive homology ( $p < 0.1$ ).  
 Protein scores are derived from ions scores as a non-probabilistic basis for ranking protein hits.

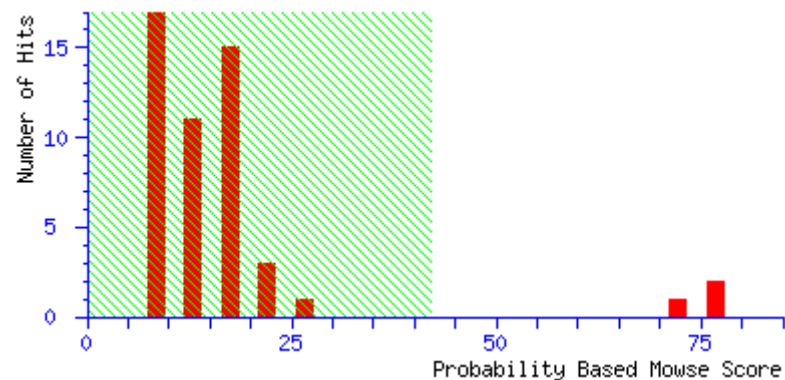

## Peptide Summary Report

Format As Peptide Summary

[Help](#)

Significance threshold  $p < 0.1$

Max. number of hits AUTO

Standard scoring  MudPIT scoring  Ions score or expect cut-off 0

Show sub-sets 0

Show pop-ups  Suppress pop-ups  Sort unassigned Decreasing Score

Require bold red

Primary type  Weighted  Normalisation  Median ratio [Help](#)  
 Supplemental material (ESI) for Chemical Communications  
 This journal is (c) The Royal Society of Chemistry 2009  
 Report peptide ratios   Outlier removal Automatic  Min. # peptides 1  
 Min. precursor charge 1  Peptide threshold Minimum score of  15

Error tolerant

1. [CATA\\_BOVIN](#) **Mass:** 66273 **Score:** 77 **Queries matched:** 3  
 Catalase (EC 1.11.1.6).- Bos taurus (Bovine).

Check to include this hit in error tolerant search or archive report

| Quantitation: | Ratio   | Weighted | N | SD(geo) |
|---------------|---------|----------|---|---------|
|               | 115/114 | 0.996    | 3 | 1.073   |
|               | 116/114 | 1.022    | 3 | 1.039   |
|               | 117/114 | 1.056    | 3 | NN      |
|               | 118/114 | 1.095    | 3 | 1.061   |
|               | 119/114 | 0.910    | 3 | 1.060   |

| Query                                                 | Observed  | Mr(expt)  | Mr(calc)  | Delta   | Miss | Score | Expect | Rank | 115/114 | 116/114 | 117/114 | 118/114 | 119/114 | Peptide         |
|-------------------------------------------------------|-----------|-----------|-----------|---------|------|-------|--------|------|---------|---------|---------|---------|---------|-----------------|
| <input checked="" type="checkbox"/> <a href="#">1</a> | 1173.7300 | 1172.7227 | 1172.7260 | -0.0033 | 0    | 31    | 1.8    | 1    | 0.901   | 0.950   | 1.170   | 1.024   | 0.818   | K.LNSLTVGPR.G   |
| <input checked="" type="checkbox"/> <a href="#">2</a> | 1263.6600 | 1262.6527 | 1262.6751 | -0.0223 | 0    | 18    | 48     | 1    | 1.076   | 1.066   | 1.000   | 1.162   | 0.973   | R.THFSGDVQR.F   |
| <input checked="" type="checkbox"/> <a href="#">4</a> | 1502.8000 | 1501.7927 | 1501.7908 | 0.0019  | 0    | 30    | 1.7    | 1    | 0.889   | 1.015   | 1.000   | 0.977   | 0.875   | R.LAHEDPDYGLR.D |

**Proteins matching the same set of peptides:**

- [CSBO](#) **Mass:** 63859 **Score:** 77 **Queries matched:** 3  
catalase (EC 1.11.1.6) [validated] - bovine
- [4BLCA](#) **Mass:** 62642 **Score:** 77 **Queries matched:** 3  
catalase (EC 1.11.1.6), chain A - bovine
- [8CATA](#) **Mass:** 62513 **Score:** 77 **Queries matched:** 3  
catalase (EC 1.11.1.6), chain A - bovine
- [AAI03067](#) **Mass:** 66404 **Score:** 77 **Queries matched:** 3  
BC103066 NID: - Bos taurus

2. [OACH](#) **Mass:** 47756 **Score:** 75 **Queries matched:** 1  
 ovalbumin [validated] - chicken

Check to include this hit in error tolerant search or archive report

| Quantitation: | Ratio   | Weighted | N | SD(geo) |
|---------------|---------|----------|---|---------|
|               | 115/114 | ---      | 1 | ---     |
|               | 116/114 | ---      | 1 | ---     |

117/114 --- 1 ---  
 Supplementary Material (ESI) for Chemical Communications  
 This journal is (c) The Royal Society of Chemistry 2009  
 117/114 --- 1 ---

| Query                               | Observed | Mr(expt)  | Mr(calc)  | Delta     | Miss    | Score | Expect | Rank   | 115/114 | 116/114 | 117/114 | 118/114 | 119/114 | Peptide |                      |
|-------------------------------------|----------|-----------|-----------|-----------|---------|-------|--------|--------|---------|---------|---------|---------|---------|---------|----------------------|
| <input checked="" type="checkbox"/> | <u>6</u> | 1904.9800 | 1903.9727 | 1904.0135 | -0.0408 | 0     | 75     | 4e-005 | 1       | 1.028   | 0.985   | 0.964   | 0.877   | 1.201   | R.GGLEPINFQTAADQAR.E |

Proteins matching the same set of peptides:

[OVAL\\_CHICK](#) Mass: 47625 Score: 75 Queries matched: 1  
 Ovalbumin (Plakalbumin) (Allergen Gal d 2) (Gal d II).- Gallus gallus (Chicken).  
[IOVAB2](#) Mass: 37887 Score: 75 Queries matched: 1  
 ovalbumin, chain B, fragment 2 - chicken  
[IOVAC1](#) Mass: 42648 Score: 75 Queries matched: 1  
 ovalbumin, chain C, fragment 1 - chicken  
[CAA23681](#) Mass: 19424 Score: 75 Queries matched: 1  
 GGALB1 NID: - Gallus gallus  
[CAA23682](#) Mass: 47786 Score: 75 Queries matched: 1  
 GGALB2 NID: - Gallus gallus  
[CAC28424](#) Mass: 116079 Score: 75 Queries matched: 1  
 Sequence 20 from Patent WO0104344.- Cloning vector pINT1.  
[CAC28434](#) Mass: 50198 Score: 75 Queries matched: 1  
 Sequence 54 from Patent WO0104344.- Cloning vector pINT1.  
[AAO43266](#) Mass: 47780 Score: 75 Queries matched: 1  
 AY223553 NID: - Gallus gallus

3. [ABBOS](#) Mass: 84469 Score: 73 Queries matched: 2  
 serum albumin precursor [validated] - bovine

Check to include this hit in error tolerant search or archive report

| Quantitation: | Ratio   | Weighted | N | SD(geo) |
|---------------|---------|----------|---|---------|
|               | 115/114 | 1.017    | 2 | 1.036   |
|               | 116/114 | 1.053    | 2 | 1.169   |
|               | 117/114 | 1.086    | 2 | 1.257   |
|               | 118/114 | 1.142    | 2 | 1.194   |
|               | 119/114 | 1.044    | 2 | 1.026   |

| Query                               | Observed | Mr(expt)  | Mr(calc)  | Delta     | Miss    | Score | Expect | Rank | 115/114 | 116/114 | 117/114 | 118/114 | 119/114 | Peptide |              |
|-------------------------------------|----------|-----------|-----------|-----------|---------|-------|--------|------|---------|---------|---------|---------|---------|---------|--------------|
| <input checked="" type="checkbox"/> | <u>3</u> | 1356.8200 | 1355.8127 | 1355.8426 | -0.0299 | 0     | 39     | 0.25 | 1       | 0.973   | 0.860   | 0.802   | 0.905   | 1.078   | K.AEFVEVTK.L |
| <input checked="" type="checkbox"/> | <u>5</u> | 1502.8200 | 1501.8127 | 1501.7961 | 0.0166  | 0     | 34     | 0.71 | 1       | 1.038   | 1.145   | 1.220   | 1.254   | 1.028   | K.QNCDQFEK.L |

Proteins matching the same set of peptides:

[Q3I349\\_BOSIN](#) Mass: 65911 Score: 73 Queries matched: 2

Serum albumin (Fragment).- Bos indicus (Zebu).

[AA10248](#) **Mass:** 84452 **Score:** 73 **Queries matched:** 2  
Supplementary Material (ESI) for Chemical Communications  
This journal is (c) The Royal Society of Chemistry 2009  
BC102742 NID: - Bos taurus

[AAN17824](#) **Mass:** 84522 **Score:** 73 **Queries matched:** 2

AF542068 NID: - Bos taurus

[AAA51411](#) **Mass:** 84492 **Score:** 73 **Queries matched:** 2

BOVALBUMIN NID: - Bos taurus

---

## Search Parameters

Type of search : MS/MS Ion Search  
Enzyme : Trypsin  
Fixed modifications : Carbamidomethyl (C),DiART6plex (K),DiART6plex (N-term),DiART6plex (K),DiART6plex (N-term)  
Mass values : Monoisotopic  
Protein Mass : Unrestricted  
Peptide Mass Tolerance :  $\pm 0.8$  Da  
Fragment Mass Tolerance:  $\pm 0.5$  Da  
Max Missed Cleavages : 0  
Instrument type : Default  
Number of queries : 6

Mascot: <http://www.matrixscience.com/>
